# Supplementary material
Source: PubMed Central journal article supplement (PMC4496622)
Supplement: IAI.00684-15_zii999091339so1.pdf [file IAI.00684-15_zii999091339so1.pdf]

Supplementary Material For:

**A Murine Model of Chemotherapy-induced ExPEC Translocation**

Sabrina I. Green<sup>1</sup>, Nadim J. Ajami<sup>1,2</sup>, Li Ma<sup>1</sup>, Nina M. Poole<sup>1</sup>, Roger E. Price<sup>3</sup>, Joseph F. Petrosino<sup>1,2</sup>, and Anthony W. Maresso<sup>1#</sup>

<sup>1</sup>Molecular Virology and Microbiology Department, Baylor College of Medicine, Houston, TX

<sup>2</sup>The Alkek Center for Metagenomics and Microbiome Research at Baylor College of Medicine

<sup>3</sup>Comparative Pathology Laboratory of the Center for Comparative Medicine at the Baylor College of Medicine

Running Title: Model of Bacterial Translocation

#Address correspondence to Anthony W. Maresso, [maresso@bcm.edu](mailto:maresso@bcm.edu)

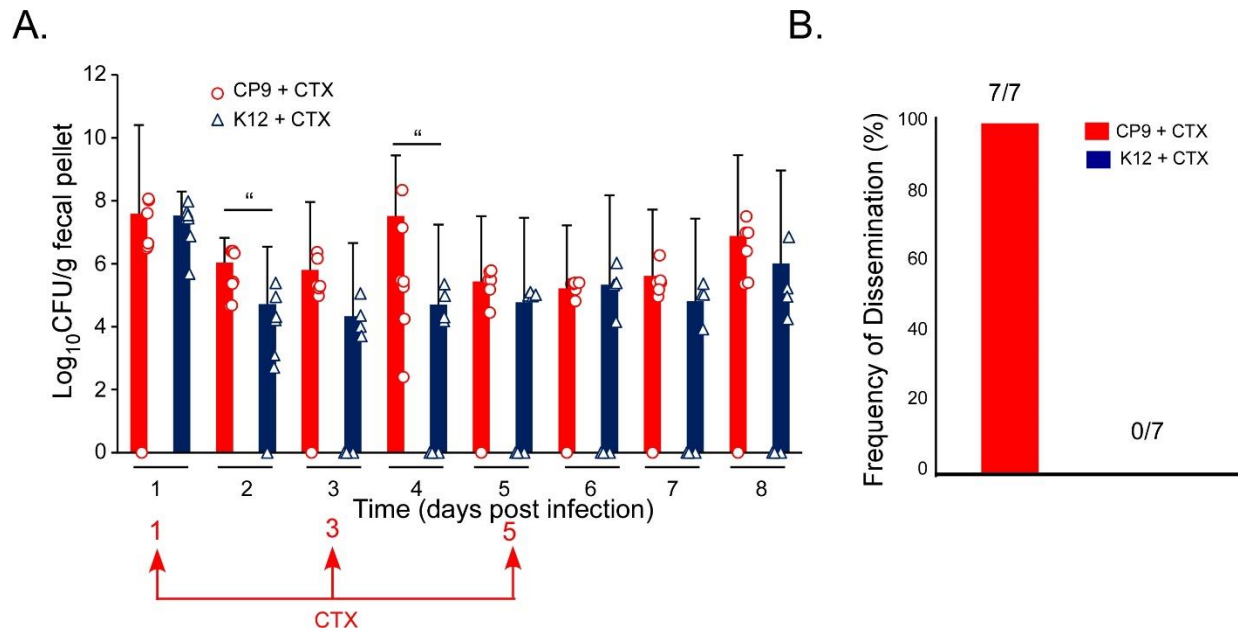

**Figure S1** (A-B) Balb/c mice were gavaged with  $10^9$  CFU's of CP9 *E. coli* (red circles) or K12 MG1655 strain of *E. coli* (blue triangles). Mice were given cytoxan on days 1, 3 and 5 post-infection. (A). Colonization was monitored by plating fecal pellets on selective media. (B). Mice were euthanized on day 8 and bacteria enumerated by plating organ homogenates on selective media. Numbers above the bars represent mice with bacteria in organs (either K12 or CP9) over total mice gavaged with bacteria. Error bars represent  $\pm$  standard deviation and (“) denotes a significant ( $p \leq 0.05$ ) difference between groups (n equals 7).

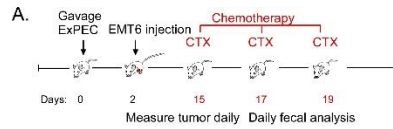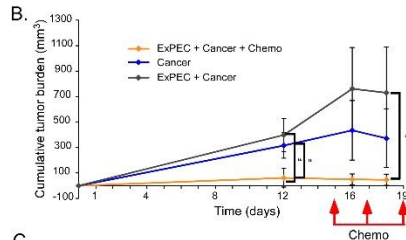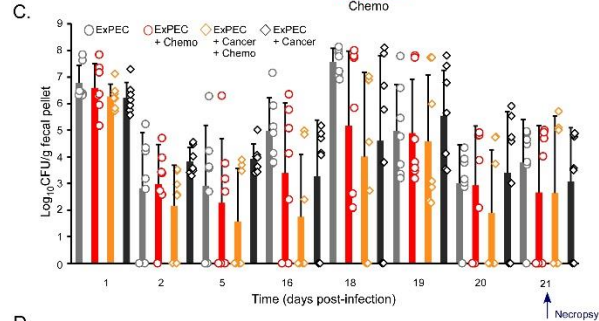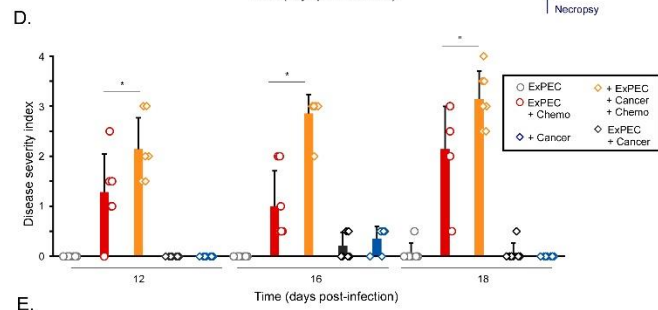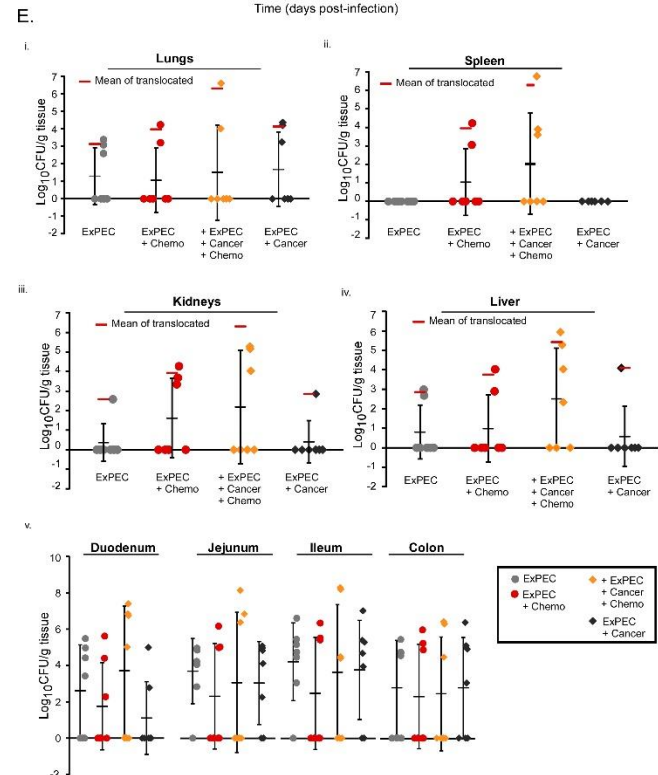

**Figure S2. Chronically-colonized ExPEC translocates in cancerous mice receiving chemotherapy.** (A) Schematic outlining the delivery of ExPEC and the development and treatment of cancer. BALB/c mice were gavaged with  $1 \times 10^9$  CFU's of CP9 or left uninfected and two days later mice were orthotopically injected with EMT-6 mammary carcinoma cells ( $1 \times 10^5$ ) on the right and left (B) mammary fat pad. Mice were treated with two rounds of cytoxan (150mg/kg, per day) for 6 days, as indicated. Tumor growth was monitored by measuring volume ( $\text{mm}^3$ ) as described in the *Experimental Procedures*. (C) Fecal pellets were collected and plated on LB/Agar<sup>Chlor+</sup> to enumerate shed CFUs. (D) Disease was monitored on days 12, 16 and 18 as described in the *Experimental Procedures*. (E) Bacteria translocation and intestinal colonization was determined by plating organs on LB/Agar<sup>Chlor+</sup>. Error bars represent  $\pm$  standard deviation and (“) denotes a significant ( $p \leq 0.05$ ) difference between groups.

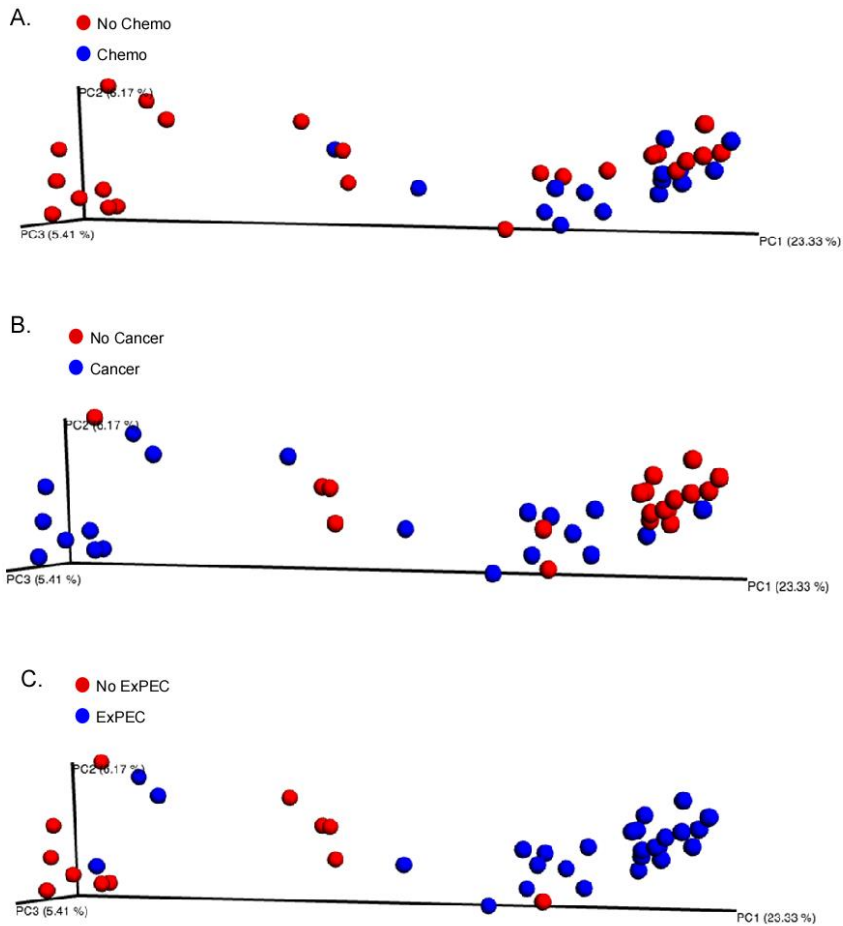

**Figure S3. Diversity of the blood microbiota.** Principal Coordinate Analysis of bacterial blood communities by unweighted UniFrac distances in **(A)** No Chemo and Chemo ( $p = 0.021$ ), **(B)** No Cancer and Cancer ( $p = 0.004$ ), and **(C)** No ExPEC and ExPEC ( $p = 0.001$ ) groups. Coordinates are scaled to the percent of variability explained.

| <b>GROUP</b>                      | <b>Mouse #</b> | <b>Metastasis (+/-)</b> |
|-----------------------------------|----------------|-------------------------|
| <b>Cancer +<br/>Chemotherapy</b>  | 1              | -                       |
|                                   | 2              | -                       |
|                                   | 3              | -                       |
|                                   | 4              | -                       |
|                                   | 5              | -                       |
|                                   | 6              | -                       |
|                                   | 7              | -                       |
| <b>Cancer No<br/>Chemotherapy</b> | 8              | -                       |
|                                   | 9              | +                       |
|                                   | 10             | +                       |
|                                   | 11             | -                       |
|                                   | 12             | +                       |
|                                   | 13             | +                       |
|                                   | 14             | +                       |

**Table S1: Assessment of tumor metastasis to the lungs.** Mice were implanted with EMT-6 mammary cancer cells, infected with ExPEC, and treated with chemotherapy. Following necropsy of the mice, the lungs of cancerous mice treated with chemotherapy and those not treated with chemotherapy were examined histologically for the presence of EMT-6 cells into the mammary epithelium. No metastasis identified is indicated with a minus sign whereas lung tissue with metastasis is indicated with a plus sign.
